# Supplementary material for: T cell receptor convergence is an indicator of antigen-specific T cell response in cancer immunotherapies
Source: eLife. 2022 Nov 9;11:e81952. doi: 10.7554/eLife.81952 (PMC9683788; doi:10.7554/eLife.81952)
Supplement: Supplementary file 1. — Public datasets used in this study are summarized in this table. A total of 3 single-cell immune profiling datasets and 11 bulk TCR-seq datasets are involved in this study. The table lists the original project information and accession numbers for each dataset. [file elife-81952-supp1.xlsx]

## Sheet: Sheet1
Supplementary Table 1 Details of datasets used in this study
Data Type	Project Name	Researchers	Data Resource
single cell immune profiling	A new way of exploring immunity: linking highly multiplexed antigen recognition to immune repertoire and phenotype	10x Genomics	10x Genomicswebsite: https://www.10xgenomics.com/resources/datasets/cd-8-plus-t-cells-of-healthy-donor-1-1-standard-3-0-2
	Concurrent delivery of immune checkpoint blockade modulates T cell dynamics to enhance neoantigen vaccine-generated antitumor immunity	Bo Li; Hongyi Zhang; Longchao	In-house data; GEO accession number: GSE178881
	Pan-cancer single-cell landscape of tumor-infiltrating T cells	S Qin, W Si, A Wang,et al.	GEO accession number: GSE156728
bulk TCRβ-seq	Immunosequencing identifies signatures of cytomegalovirus exposure history and HLA-mediated effects on the T-cell repertoire	Emerson, R., DeWitt, W., Vignali, M. et al.	immuneACCESS DOI：https://doi.org/10.21417/B7001Z
	Comprehensive T cell repertoire characterization of non-small cell lung cancer	Reuben, A., Zhang, J., Chiou, SH. et al.	immuneACCESS DOI：https://doi.org/10.21417/AR2019NC
	Tumor and Microenvironment Evolution during Immunotherapy with Nivolumab	N. Riaz, J. J. Havel, V. Makarov, et al.	immuneACCESS DOI：https://doi.org/10.1016/j.cell.2017.09.028
	Radiation induces dynamic changes to the T cell repertoire in renal cell carcinoma patients	Chow J , Hoffend NC , Scott AI, et al.	immuneACCESS DOI：https://doi.org/10.21417/JC2020PNAS
	Bulk TCRβ-seq of patients with renal cancers	Beshnova et al	https://zenodo.org/record/3894880#.YpwDFy-B2bE
	Bulk TCRβ-seq of patients with high-Grade ovarian cancer	Beshnova et al	https://zenodo.org/record/3894880#.YpwDFy-B2bE
	A large-scale database of T-cell receptor beta (TCRb) sequences and binding associations from natural and synthetic exposure to SARS-CoV-2	Nolan S, Vignali M, Klinger M. et al.	immuneACCESS DOI：https://doi.org/10.21417/ADPT2020COVID
	Contribution of systemic and somatic factors to clinical response and resistance to PD-L1 blockade in urothelial cancer: An exploratory multi-omic analysis	Snyder A, Nathanson T, Funt SA. et al.	immuneACCESS DOI：https://doi.org/10.21417/B7MG68
	Association of Tumor Microenvironment T-Cell Repertoire and Mutational Load With Clinical Outcome After Sequential Checkpoint Blockade in Melanoma	Erik Y, Marissa V, Richard KW. et al.	immuneACCESS DOI：https://doi.org/10.21417/EY2019CIR
	A peripheral immune signature of responsiveness to PD1 blockade in patients with classical Hodgkin lymphoma	Cader, F.Z., Hu, X., Goh, W.L. et al.	immuneACCESSDOI：https://doi.org/10.21417/FZC2020NM
	immunoSEQ hsTCRB-V4b Control Data	Hamm, David, Adaptive Biotechnologies	immuneACCESSDOI：https://doi.org/10.21417/ADPT2020V4CD
