# Supplementary material for: T cell receptor convergence is an indicator of antigen-specific T cell response in cancer immunotherapies
Source: eLife. 2022 Nov 9;11:e81952. doi: 10.7554/eLife.81952 (PMC9683788; doi:10.7554/eLife.81952)
Supplement: Supplementary file 2. — The T cell cluster characteristics were summarized based on the gene expression signature of each cluster. This study only included the samples sequenced in the original study (Zheng et al., 2021), additional datasets used in the original publication that were sourced from other cohorts were not included in this study. [file elife-81952-supp2.xlsx]

## Sheet: Sheet1
Supplementary Table 2 The clusters annotation in human pan-cancer data
Cluster	Defined Cell Type	Signature Genes
CD4-01-FOS	CD4 Effector memory T cells	FOS, CCL4, CD69, IL7R, KLRB1
CD4-02-FOXP3	CD4 Tregs	FOXP3, CTLA4, IKZF2, IL2RA
CD4-03-CCR7	CD4 Naive T cells	CCR7, SELL, LEF1, S1PR1
CD4-04-CCR6	CD4 effector T cells	CCR6, KLRB1, IL7R, S100A11
CD4-05-GZMA	CD4 activating T cells	GIMAP7, RPS29, RPS21
CD4-06-IL2RA	CD4 Tregs	FOXP3, IL2RA, CTLA4, LAG3, IKZF2
CD4-07-CD200	CD4 Follicular helper T cells	CD200, TOX, CXCR5, TNFSF8
CD4-08-S100A11	CD4 effector T cells	GZMA, S100A11, KLRB1, ITGB1, CXCR6
CD4-09-CD69	CD4 effector T cells	CD69, IFNG, TNF
CD4-10-IFNG	CD4 effector T cells	IFNG, NKG7, CCL4, CST7, PRF5, GZMA, GZMB,
		CCL3
CD4-11-NKG7	CD4 effector T cells	NKG7, CCL4, CST7, PRF5, GZMA, GZMB, TBX21
CD4-12-ISG15	CD4 IFNs responsive T cells	ISG15, IFI6, MX1, IFIT1, LY6E
CD4-13-STMN1	CD4 proliferative T cells	STMN1, TUBB, TUBA1B, MKI67
CD4-14-GNLY	CD4 effector T cells	GNLY, NKG7, PRF1, CCL4, KLRB1, GZMB,
		GZMA, ZNF683
CD8-01-XCL1	CD8 resident memory T cells	XCL1, CXCR6, GZMB, ITGAE, ITGA1
CD8-02-GZMK	CD8 effector memory T cells	GZMK, CD28, EOMES, CCR7, CXCR3, CXCR5
CD8-03-TIGIT	CD8 exhausted T cells	TIGIT, CTLA4, LAYN, ENTPD1, LAG3, HAVCR2,
		TOX, PDCD1
CD8-04-ZNF683	CD8 effector memory T cells	ZNF683, CD27, GZMA, EOMES, CXCR3
CD8-05-FGFBP2	CD8 cytotoxic T cells	FGFBP2, GNLY, NKG7, PRF1, GZMB
CD8-06-IFNG	CD8 cytotoxic T cells	CCL4, IFNG, TNF, CD69, CCL3
CD8-07-IHSPA6	CD8 dysfunctional T cells	HSPA6, HSPA1A, HSPA1B, HSPH1
CD8-08-PRF1	CD8 cytotoxic T cells	NKG7, PRF1, GZMB, CCL3
CD8-09-IL7R	CD8 naive T cells	CCR7, IL7R, SELL, S1PR1, LEF1, CD28
CD8-10-IFI6	CD8 IFNs responsive T cells	IFI6, MX1, IFI27, IFIT1, STAT1
CD8-11-STMN1	CD8 proliferative T cells	STMN1, TUBB, TUBA1B, MKI67
CD8-12-KLRB1	CD8 cytotoxic T cells	KLRB1, CCR6, TNF, RORC, FOS
CD8-13-CCR7	CD8 naive T cells	CCR7, SELL, LEF1, IL7R, S1PR1. SELL
CD8-14-CXCR6	CD8 resident memory T cells	CXCR6, PDCD1, ITGAE, LAYN
CD8-15-CTLA4	CD8 exhausted T cells	CTLA4, LAYN, ENTPD1, TIGIT, LAG3
